# Supplementary material
Source: PubMed Central journal article supplement (PMC2631058)
Supplement: pbio.1000010.st001.pdf [file pbio.1000010.st001.pdf]

### *Algebraic equations for the conservation relations*

$$[\text{Mad2}_T] = [\text{Mad2}] + [\text{Cdc20:C-Mad2}] + 2 \cdot [\text{Cdc20:C-Mad2:O-Mad2}] + [\text{Mad1:C-Mad2:O-Mad2}] + [\text{Cdc20:C-Mad2:p31}^{\text{comet}}]$$

$$[\text{Cdc20}_T] = [\text{Cdc20}] + [\text{Cdc20:C-Mad2}] + [\text{Cdc20:C-Mad2:O-Mad2}] + [\text{Cdc20:C-Mad2:p31}^{\text{comet}}]$$

$$[\text{Mad1:C-Mad2}_T] = [\text{Mad1:C-Mad2}] + [\text{Mad1:C-Mad2:O-Mad2}]$$

$$[\text{p31}^{\text{comet}}_T] = [\text{p31}^{\text{comet}}] + [\text{Cdc20:C-Mad2:p31}^{\text{comet}}]$$

### *Rates*

$$\text{Reaction 1: } V_{\text{bind}} = k_{\text{bind,on}} [\text{Cdc20}] [\text{O-Mad2}] - k_{\text{bind,off}} [\text{Cdc20:C-Mad2}]$$

$$\text{Reaction 2: } V_{\text{m1,dim}} = k_{\text{dim,on}} [\text{Mad1:C-Mad2}] [\text{O-Mad2}] - k_{\text{dim,off}} [\text{Mad1:C-Mad2:O-Mad2}]$$

$$\text{Reaction 3: } V_{\text{m1,cat}} = k_{\text{cat,on}} [\text{Cdc20}] [\text{Mad1:C-Mad1:O-Mad2}] - k_{\text{cat,off}} [\text{Cdc20:C-Mad2}] [\text{Mad1:C-Mad2}]$$

$$\text{Reaction 4: } V_{\text{dim}} = k_{\text{dim,on}} [\text{Cdc20:C-Mad2}] [\text{O-Mad2}] - k_{\text{dim,off}} [\text{Cdc20:C-Mad2:O-Mad2}]$$

$$\text{Reaction 5: } V_{\text{cat}} = k_{\text{cat,on}} [\text{Cdc20}] [\text{Cdc20:C-Mad1:O-Mad2}] - k_{\text{cat,off}} [\text{Cdc20:C-Mad2}]^2$$

$$\text{Reaction 6: } V_{\text{p31}} = k_{\text{bindp31,on}} [\text{Cdc20:C-Mad2}] [\text{p31}^{\text{comet}}] - k_{\text{bindp31,off}} [\text{Cdc20:C-Mad2:p31}^{\text{comet}}]$$

### *Differential Equations*

$$1) \frac{d[\text{O-Mad2}]}{dt} = -V_{\text{bind}} - V_{\text{dim}} - V_{\text{m1,dim}}$$

$$2) \frac{d[\text{Cdc20}]}{dt} = -V_{\text{m1,cat}} - V_{\text{cat}} - V_{\text{bind}}$$

$$3) \frac{d[\text{Cdc20:C-Mad2}]}{dt} = V_{\text{bind}} - V_{\text{dim}} + 2 \cdot V_{\text{cat}} + V_{\text{m1,cat}} - V_{\text{p31}}$$

$$4) \frac{d[\text{Cdc20:C-Mad2:O-Mad2}]}{dt} = V_{\text{dim}} - V_{\text{cat}}$$

$$5) \frac{d[\text{Mad1:C-Mad2:O-Mad2}]}{dt} = V_{\text{m1,dim}} - V_{\text{m1,cat}}$$

$$6) \frac{d[\text{Mad1:C-Mad2}]}{dt} = -V_{m1,\text{dim}} + V_{m1,\text{cat}}$$

$$7) \frac{d[\text{Cdc20:C-Mad2:p31}^{\text{comet}}]}{dt} = V_{p31}$$

$$8) \frac{d[\text{p31}^{\text{comet}}]}{dt} = -V_{p31}$$
