# Supplementary material
Source: PubMed Central journal article supplement (PMC2631058)

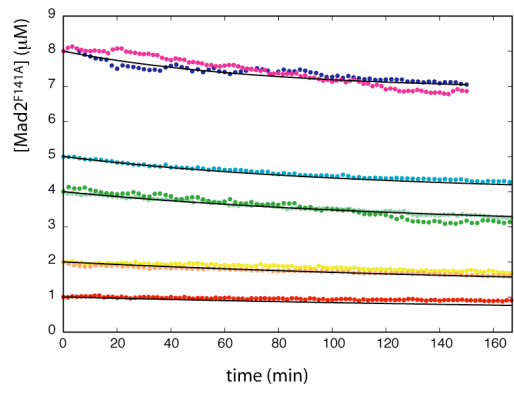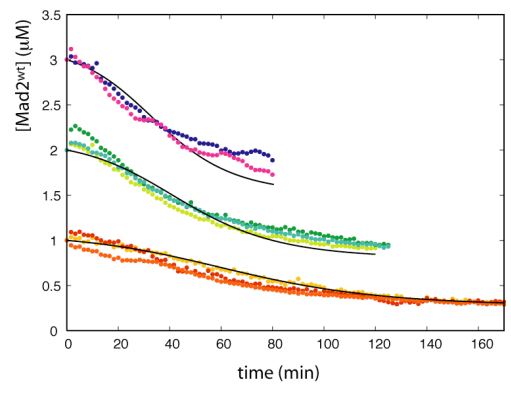

Supplement: pbio.1000010.sg002.pdf [file pbio.1000010.sg002.pdf]

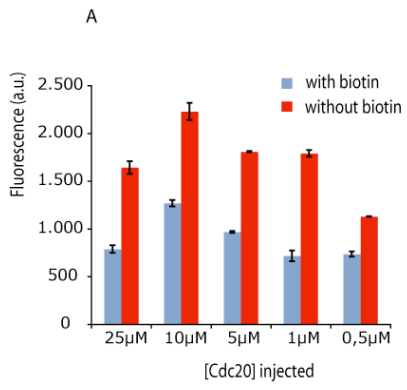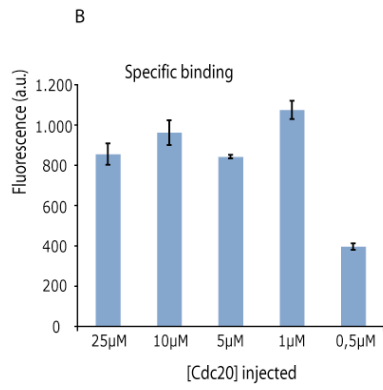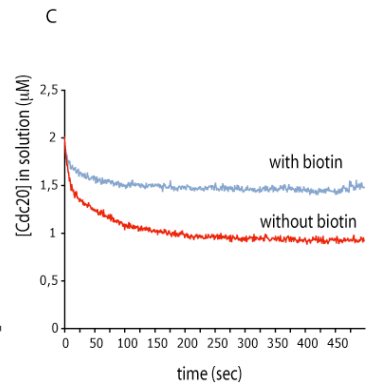

Supplement: pbio.1000010.sg004.pdf [file pbio.1000010.sg004.pdf]

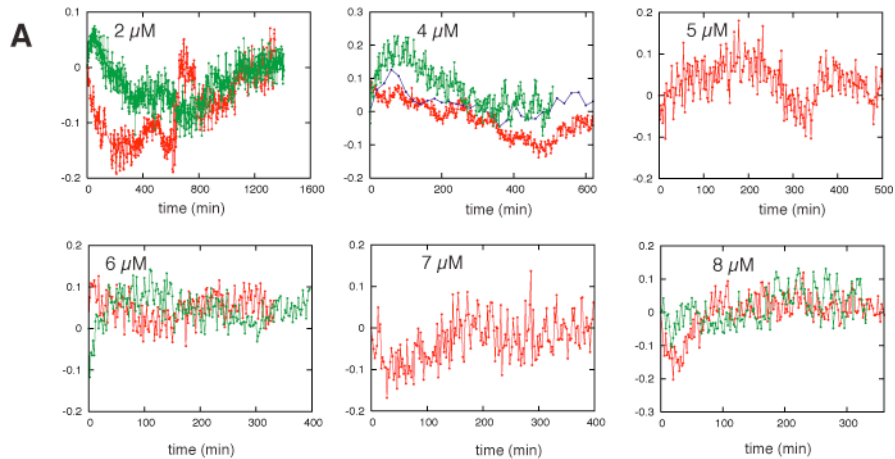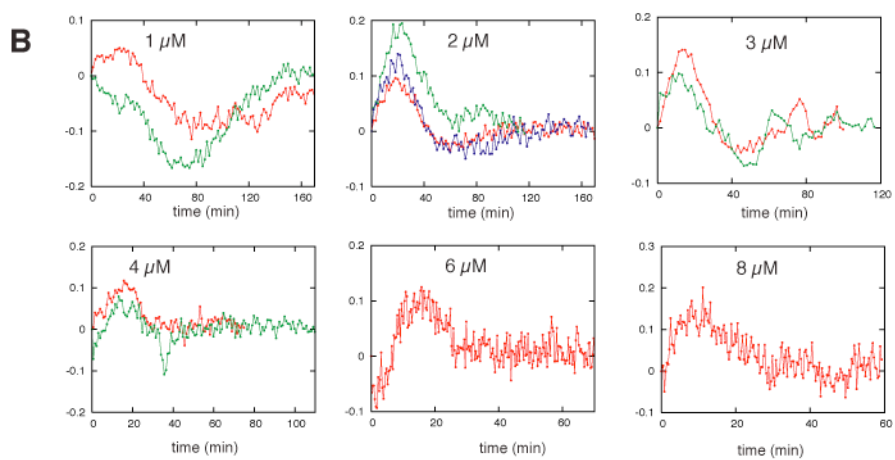

Supplement: pbio.1000010.sg005.pdf [file pbio.1000010.sg005.pdf]
